# Supplementary figures and images for: Sildenafil Supplementation for Women Undergoing Infertility Treatments: A Systematic Review and Meta-Analysis of Randomized Controlled Trials
Source: MDPI journal article supplement (doi:10.3390/jcm10194346), 2021-09-24

a. Endometrial Thickness

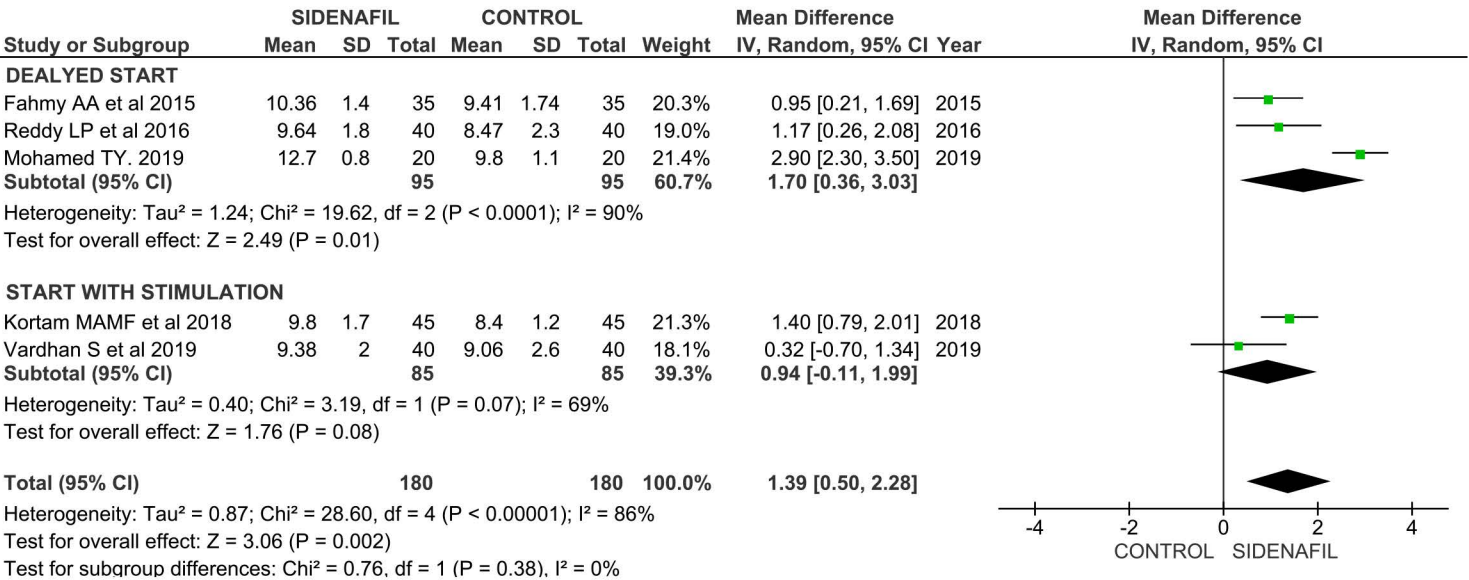

b. Chemical Pregnancy Rate

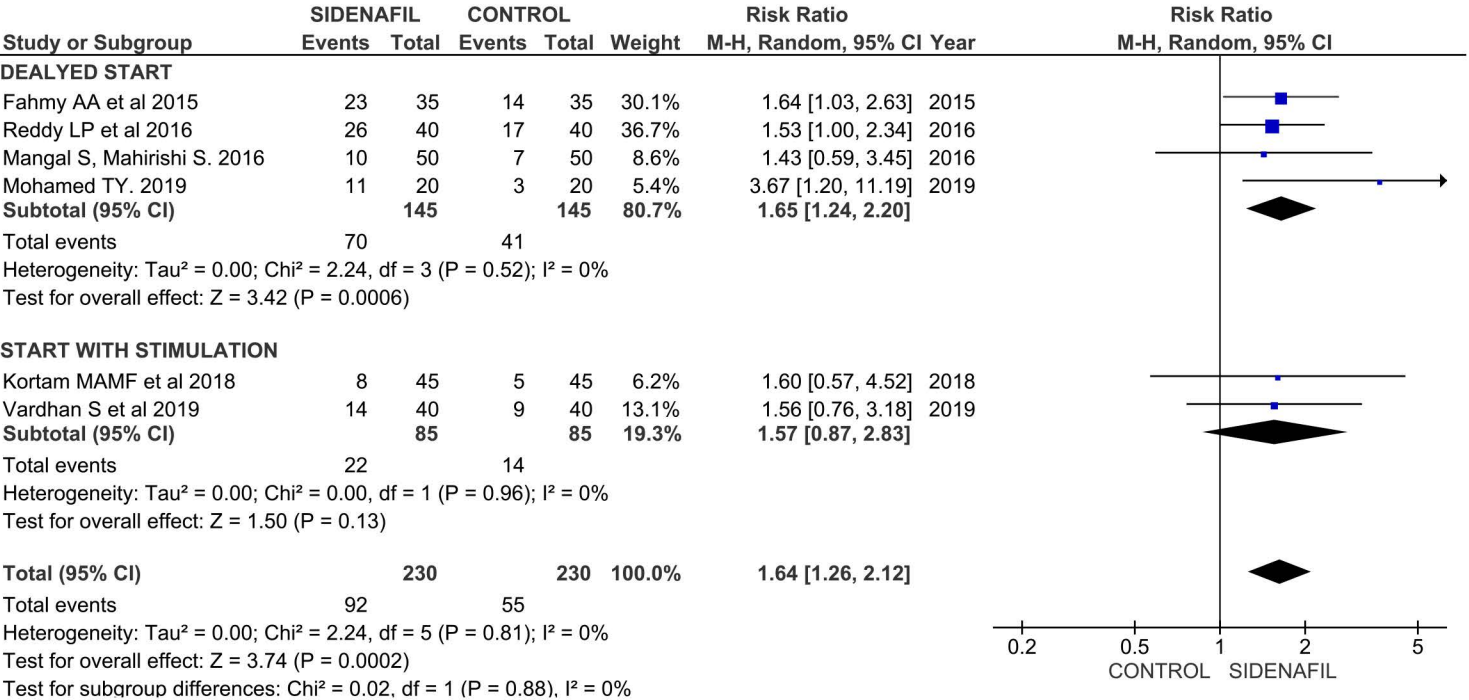

Supplement: s1 [file s1]

a. Endometrial Thickness

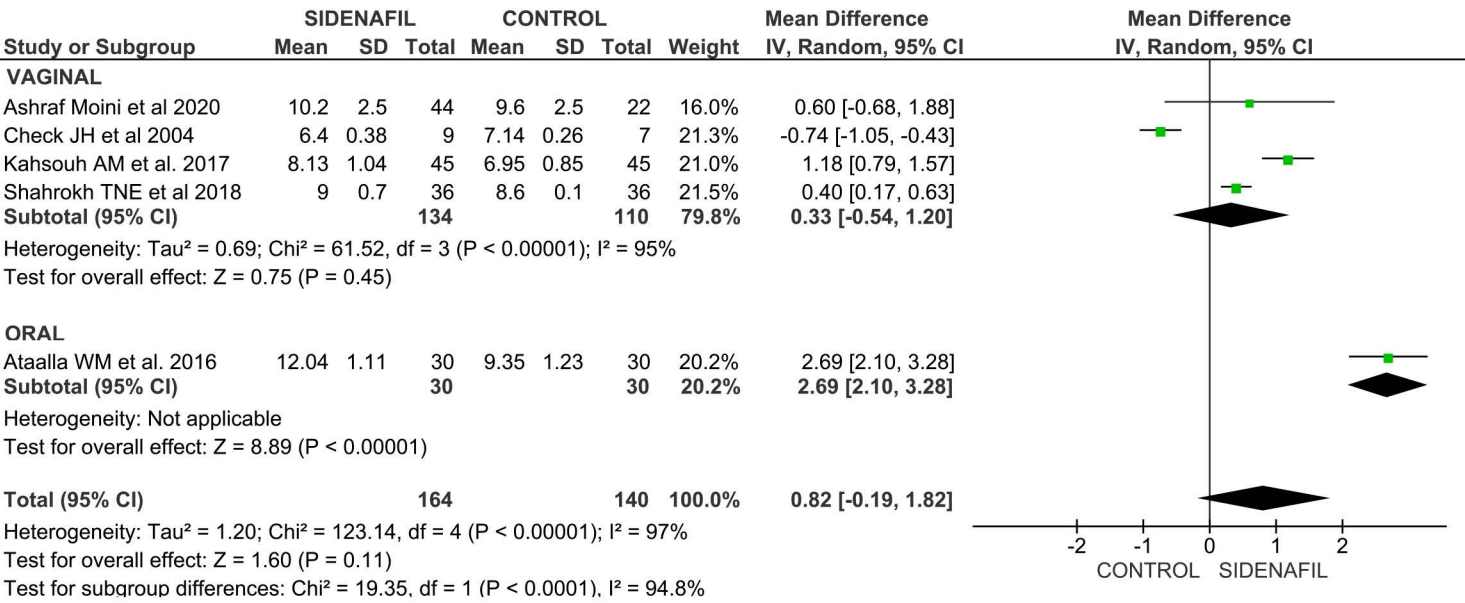

b. Chemical Pregnancy Rate

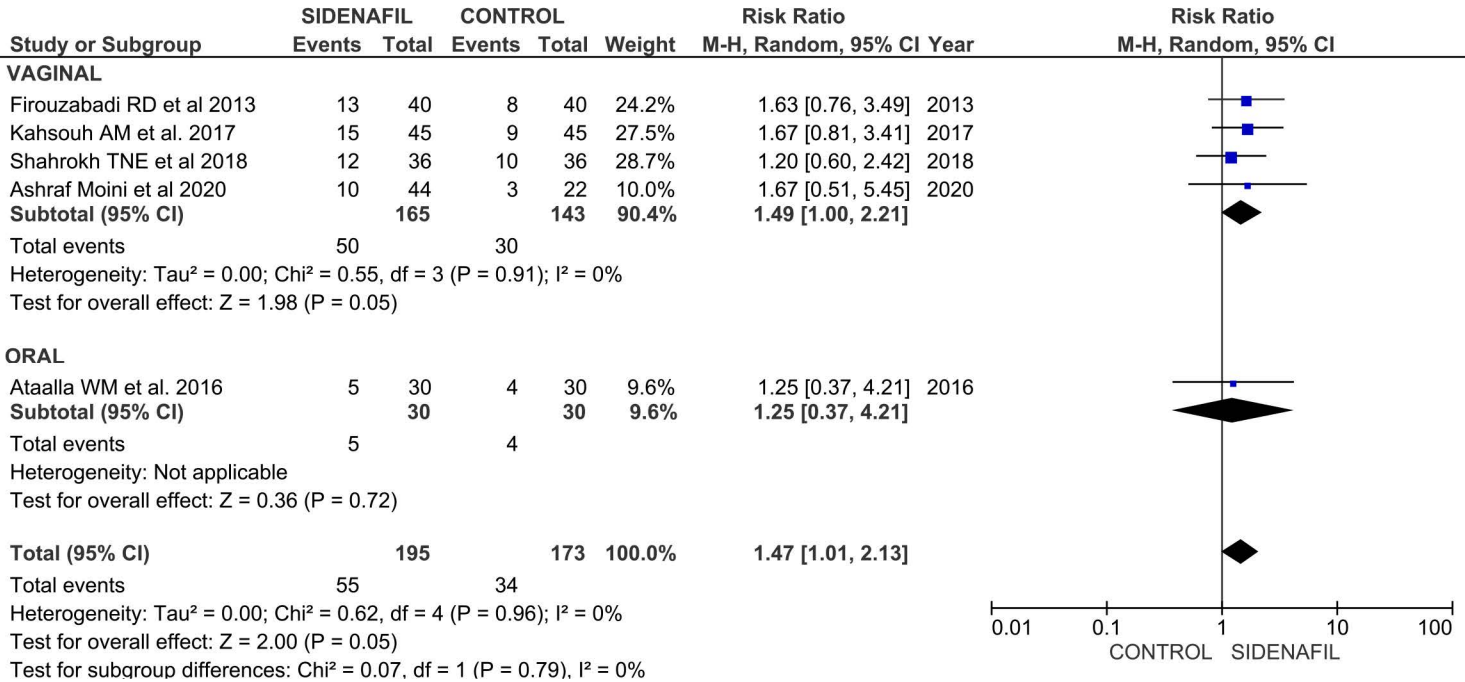

Supplement: s1 [file s1]
